# Supplementary material
Source: publisher figshare collection journal article supplement (https://acs.figshare.com/ndownloader/files/18547691)
Supplement: Supplementary file 1 [file 18547691]

## **Dual-emitting dot-in-bulk CdSe/CdS nanocrystals with highly emissive core- and shell-based trions sharing the same resident electron**

Valerio Pinchetti<sup>1\*</sup>, Elena V. Shornikova<sup>2</sup>, Gang Qiang<sup>2</sup>, Wan Ki Bae<sup>4</sup>, Francesco Meinardi<sup>1</sup>, Scott A. Crooker<sup>5</sup>, Dmitri R. Yakovlev<sup>2,3</sup>, Manfred Bayer<sup>2,3</sup>, Victor I. Klimov<sup>4\*</sup> and Sergio Brovelli<sup>1\*</sup>

<sup>1</sup> *Dipartimento di Scienza dei Materiali, Università degli studi di Milano-Bicocca, via Roberto Cozzi 55, I-20125 Milano, Italy*

<sup>2</sup> *Experimentelle Physik 2, Technische Universität Dortmund, 44227 Dortmund, Germany*

<sup>3</sup> *Ioffe Institute, Russian Academy of Sciences, 194021 St. Petersburg, Russia*

<sup>4</sup> *Chemistry Division, Los Alamos National Laboratory, Los Alamos, New Mexico 87545, United States*

<sup>5</sup> *National High Magnetic Field Laboratory, Los Alamos National Laboratory, Los Alamos, New Mexico 87545, United States*

\*Corresponding authors: [valerio.pinchetti@unimib.it](mailto:valerio.pinchetti@unimib.it), [klimov@lanl.gov](mailto:klimov@lanl.gov), [sergio.brovelli@unimib.it](mailto:sergio.brovelli@unimib.it)

## Methods

### **Synthesis of dot-in-bulk (DiB) nanocrystals (NCs) and structural characterization**

CdSe/CdS DiB NCs were synthesized following the procedure described in ref.<sup>1</sup>. Briefly, zincblende CdSe NCs were prepared using previously reported methods<sup>2</sup>. For the synthesis of CdSe (radius 1.5nm)/CdS NCs,  $2 \times 10^{-7}$  mol of CdSe NCs (purified twice) dispersed in 10 mL of 1-octadecene (ODE) were loaded into a 100 mL flask, degassed at 110°C for 1 h. The flask was filled with Ar and heated up to 300 °C for CdS shell growth. A 0.2 mmol sample of Cd-oleate and 0.2 mmol of 1-dodecanethiol were added slowly (0.1 mmol/min) and the reaction was maintained at the elevated temperature for 30 min to form a thin CdS buffer layer (~3 monolayers) on top of CdSe cores. For further CdS shell growth, a mixed solution of Cd-oleate and trioctylphosphine-sulfur (0.5 M/0.5 M) in ODE was continuously added at a rate of 1 mmol/hour at 300°C. After the injection of precursors was completed, the reaction products were cooled to room temperature and purified repeatedly by a precipitation-and-redispersion method. The final products were dispersed in hexane for further characterization. Transmission electron microscopy (TEM) images were obtained using a JEOL 2010 transmission electron microscope. This procedure produced DiB NCs with the 1.5 nm CdSe core radius and the 8.5 nm shell thickness.

### **Spectroscopic studies**

Steady-state and time-resolved photoluminescence (PL) spectra were obtained using excitation from a pulsed diode laser with the 3.06-eV photon energy (Edinburgh Inst. EPL 405, 40 ps pulse width) and a variable pulse repetition rate. The DiB NC samples were prepared as drop-cast films on glass substrates. For magneto-optical measurements, they were placed in a variable-temperature insert of a closed-cycle helium cryostat ( $T = 3.5 - 300$  K). The emitted light was coupled into a 600  $\mu\text{m}$  optical fiber and the PL signal was spectrally resolved with a TM-C10083CA Hamamatsu Mini-Spectrometer. The PL dynamics were studied with a Hamamatsu R943-02 time-correlated single-photon counting unit coupled to an Oriel Instruments Cornerstone 260 monochromator.

For PL studies in high pulsed magnetic fields, the samples were mounted onto a custom fiber-coupled probe that, in turn, was loaded into a helium bath cryostat with a long tail extending into the bore of a 65 T-class pulsed magnet. Light was directed to and collected from the sample using a single 600  $\mu\text{m}$  diameter multimode optical fiber. Thin film circular polarizers were used to select emitted light with a certain handedness of circular polarization. Full optical spectra were acquired every 1 ms continuously throughout the magnet pulse (~50 ms duration) using a fast CCD camera (Princeton Instruments Blaze). To switch between  $\sigma^+$  and  $\sigma^-$  circular polarizations, we switched current direction in the magnet.

Magneto-optical measurements in a DC magnetic field ( $B$ ) up to 15 T were performed using a magneto-optical setup based on a cryostat with a superconducting single-coil solenoid. An NC sample was kept in helium exchange gas at a 4.2 K temperature. Direct optical access to the sample was achieved using the top window. The  $B$  field was applied in the Faraday geometry wherein its direction was parallel to a wave vector of collected PL. The PL signal was dispersed using a 0.55-m spectrometer and detected by a liquid-nitrogen-cooled CCD or an avalanche Si-photodiode connected to a conventional time-correlated single-photon counting system. PL was excited with a pulsed diode laser (photon energy 3.06 eV, pulse duration 50 ps). The temporal resolution of this experiment was 100 ps.

**Supporting Figure S1 – X-Ray Diffraction Pattern of CdSe/CdS dot-in-bulk (DiB) nanocrystals (NCs).**

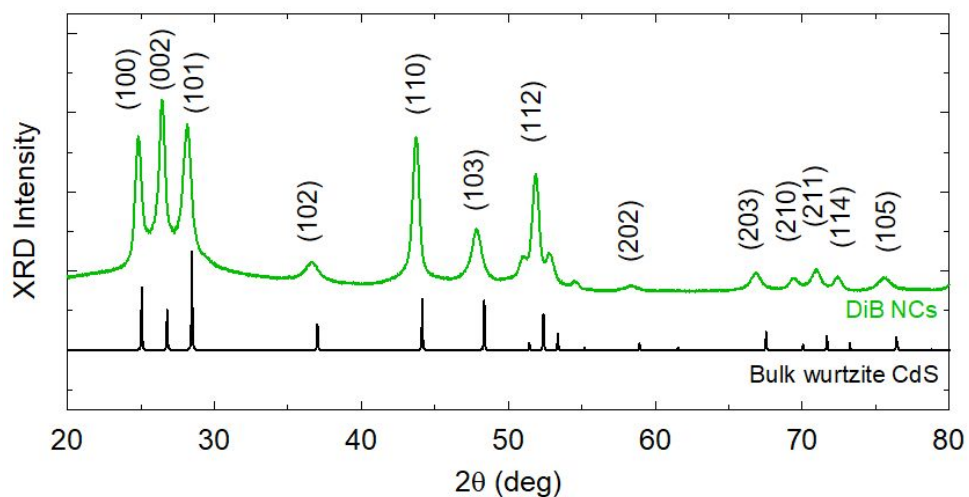

**Supporting Figure S1 – The X-ray diffraction pattern of CdSe/CdS DiB NCs (green line) compared to the pattern of bulk CdS in wurtzite crystal structure (black line).**

**Supporting Figure S2 – Transmission Electron Microscopy Image of CdSe/CdS DiB NCs.**

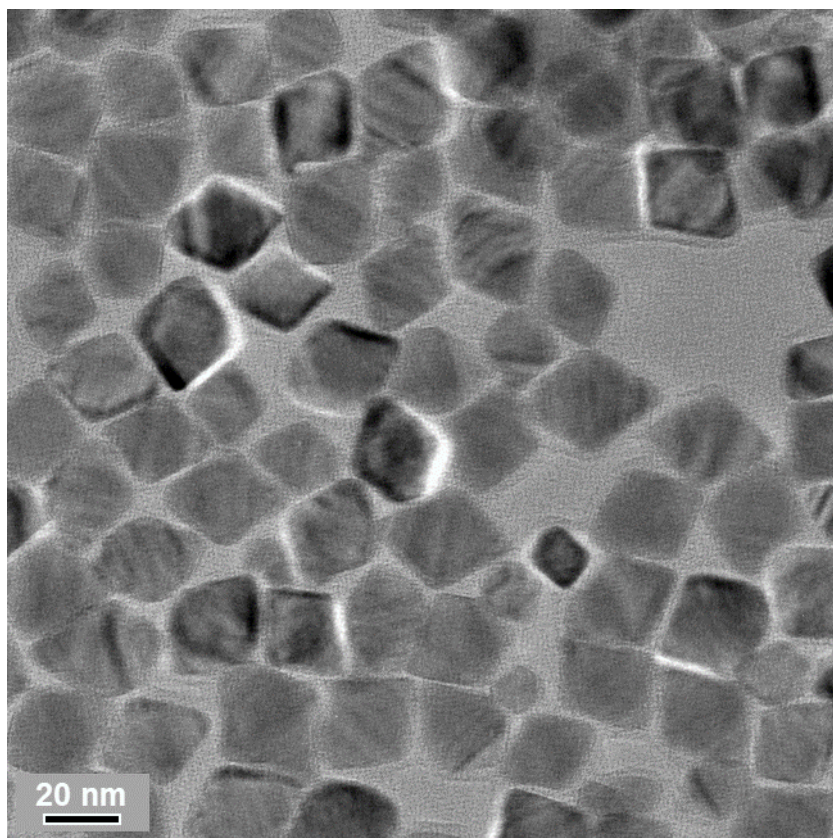

**Supporting Figure S2 –** Transmission electron microscopy (TEM) image of CdSe/CdS DiB NCs indicates a non-spherical shape due to the ultra-thick CdS shell (thickness of  $\sim 8.5$  nm).

**Supporting Figure S3 – Photoluminescence (PL) decay in DiB NCs as a function of Magnetic Fields.**

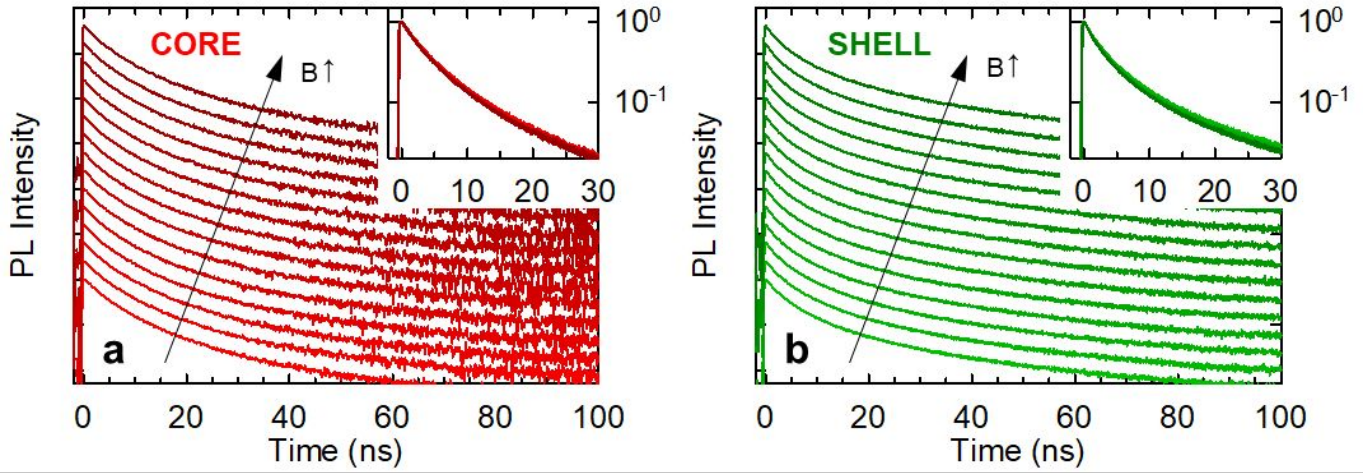

**Supporting Figure S3 –** (a) Core and (b) shell PL decays at increasing  $B$  (from 1 to 15 T with 1 T steps) and  $T = 4.2\text{K}$ . The PL traces are offset vertically for clarity. Insets: the expanded view of the first 30 ns of the same data; the PL traces are superimposed to highlight that no changes occur upon application of magnetic field. For the core PL decay,  $k_{rad}(1\text{T}) = 0.23\text{ ns}^{-1}$  and  $k_{rad}(15\text{T}) = 0.25\text{ ns}^{-1}$ , whereas for the shell PL decay,  $k_{rad}(1\text{T}) = 0.26\text{ ns}^{-1}$  and  $k_{rad}(15\text{T}) = 0.29\text{ ns}^{-1}$ .

**Supporting Figure S4 – Schematic depiction of the high-field magneto-optical experiment.**

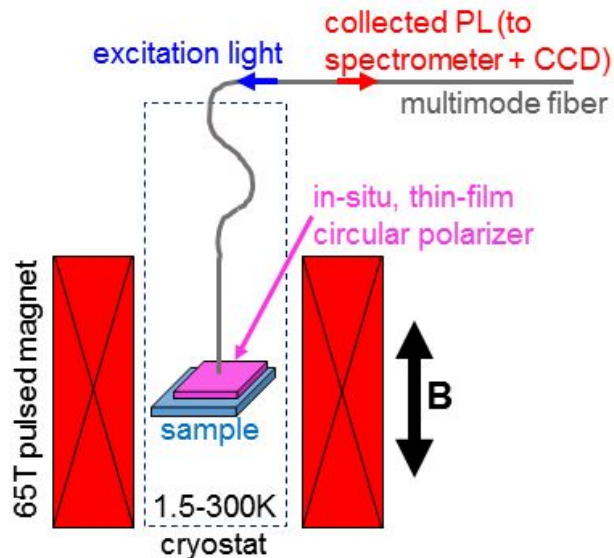

**Supporting Figure S4** –The NCs samples are mounted onto a custom fiber-coupled probe residing in a He-bath cryostat with a long tail extending into the bore of a 65 T-class pulsed magnet. Pump laser light is directed towards the sample using a 600- $\mu\text{m}$  diameter multimode optical fiber. The same fiber is used to collect the emitted PL. Thin film circular polarizers were used to select  $\sigma^-$  and  $\sigma^+$  polarized PL. Full optical spectra are acquired every 1 ms continuously throughout the magnet pulse ( $\sim 50$  ms duration) using a fast CCD camera. To switch between different circular polarizations, we switched current direction in the magnet.

**Supporting Figure S5 –Schematic depiction of the 15T magneto-optical experiment.**

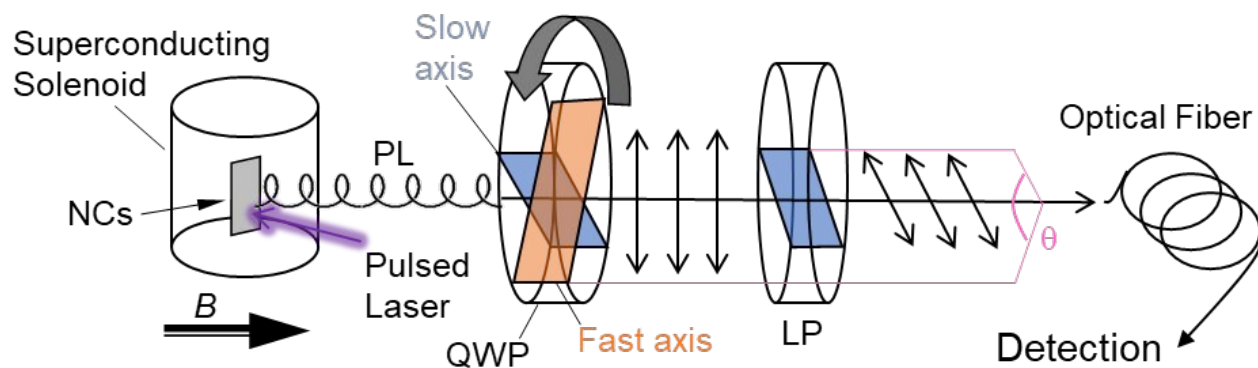

**Supporting Figure S5** – Schematic of the circular-polarization resolves magneto-PL setup used in the 15T experiments. A film of DiB NCs dip-coated onto a glass substrate is mounted in a single-coil superconducting solenoid with direct optical access and is excited with a pulsed ultraviolet laser (photon energy is 3.06 eV). The emitted two-color light is resolved for its handedness by the quarter wave plate (QWP) and the linear polarizer (LP) mounted before a light-collecting input of an optical fiber coupled to a 0.55 m spectrometer and a charge-coupled-device detector. Right- and left-handed photons are selected by adjusting the angle  $\theta$  between the fast axis of the QWP and the optical axis of the LP.

**Supporting Figure S6 – Circular-polarization-resolved PL decays and time-dependent  $P_c$ .**

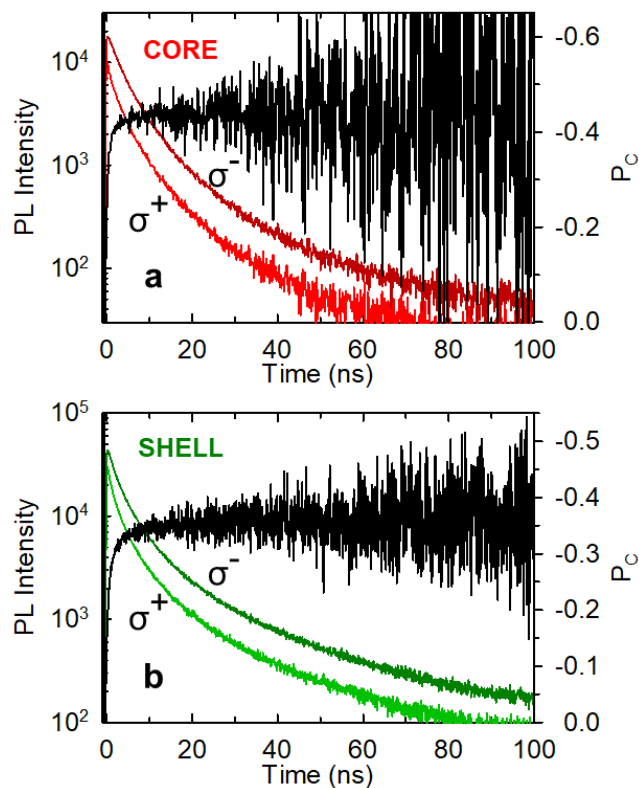

**Supporting Figure S6** – (a) Core and (b) shell CP-resolved PL decays acquired at  $B = 15$  T and  $T = 4.2$  K. Dark red and green curves refer to left-handed circularly polarized PL decays, whereas light red and green curves refer to right-handed circularly polarized PL decays. The black curves are the respective time-dependent  $P_c$  values, calculated using **Equation (1)**.



**Supporting Figure S7 – Complete set of time-dependent  $P_c$  data in different magnetic fields.**

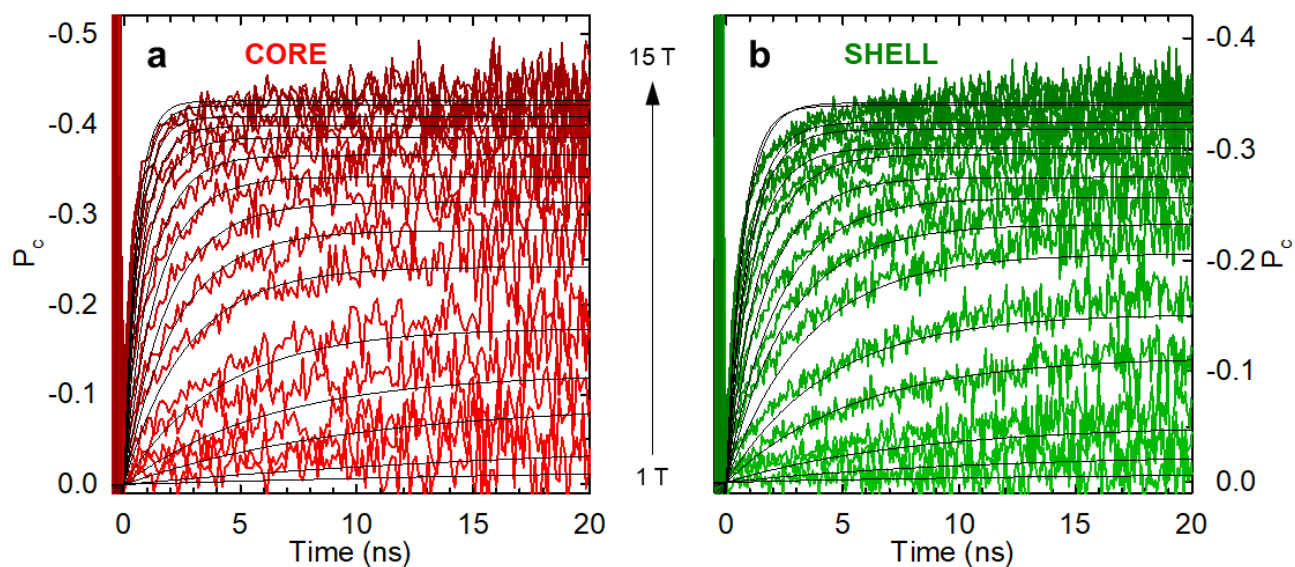

**Supporting Figure S7 –Complete sets of time-resolved  $P_c$  curves for core (a) and shell (b) emissions for  $B$  increasing from 1 T to 15 T with 1 T steps. The black curves are the results of fitting with **Equation (2)**.**

**Supporting Figure S8 – Time-dependent  $P_c$  data at different temperatures ( $B=5T$ ).**

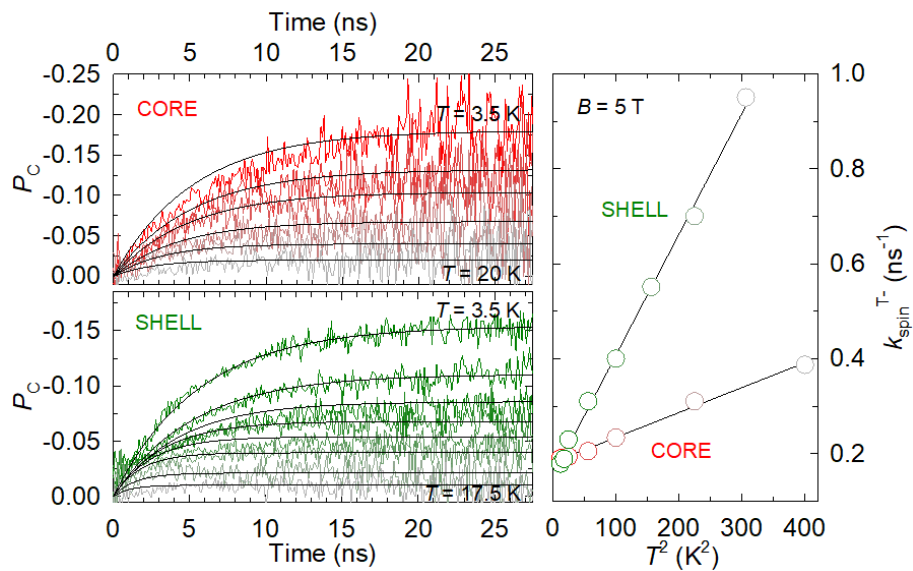

**Supporting Figure S8 –** Left panels: Complete sets of time-resolved  $P_c$  curves for core (top) and shell (bottom) emissions for  $T$  increasing from 3.5K to 20K ( $B=5T$ ). The black curves are the results of fitting with **Equation (2)**. Right panel: Spin-flip rate values extracted from the  $P_c$  dynamics as a function of  $T^2$ .

**Supporting Table S1 – Parameters obtained by fitting  $k_{spin}$  versus  $B$  with Equation (3) (T = 4.2 K).**

|                                        | CORE                 | SHELL                |
|----------------------------------------|----------------------|----------------------|
| $k_{spin,0}^T[\text{ns}^{-1}]$         | $2 \times 10^{-2}$   | $5 \times 10^{-2}$   |
| $\alpha [\text{ns}^{-1}\text{T}^{-2}]$ | $6.9 \times 10^{-3}$ | $5.6 \times 10^{-3}$ |

**Supporting Table S2 – Parameters obtained by fitting  $P_c^{eq}$  and  $P_c^{int}$  versus  $B$  with Equations (5) and (7), respectively.**

|               | CORE  | SHELL |
|---------------|-------|-------|
| hole g-factor | -0.85 | -1.2  |
| $i$           | 0.245 | 0.185 |
| $f$           | 0.255 | 0.195 |

## References

1. Galland, C.; Brovelli, S.; Bae, W. K.; Padilha, L. A.; Meinardi, F.; Klimov, V. I.; *Nano Lett.* **2013**, 13, (1), 321-328.
2. Yang, Y. A.; Wu, H.; Williams, K. R.; Cao, Y. C.; *Angew. Chem.* **2005**, 117, (41), 6870-6873.
